# Supplementary material for: Cardiovascular Toxicities Secondary to Biotherapy and Molecular Targeted Therapies in Neuroendocrine Neoplasms: A Systematic Review and Meta-Analysis of Randomized Placebo-Controlled Trials
Source: MDPI journal article supplement (doi:10.3390/cancers13092159), 2021-04-30
Supplement: s1 [file s1]

# Supplementary Materials: Cardiovascular Toxicities Secondary to Biotherapy and Molecular Targeted Therapies in Neuroendocrine Neoplasms: A Systematic Review and Meta-Analysis of Randomized Placebo-Controlled Trials

Charalampos Aktypis, Maria-Eleni Spei, Maria Yavropoulou, Göran Wallin, Anna Koumarianou, Gregory Kaltsas, Eva Kassi and Kosmas Daskalakis

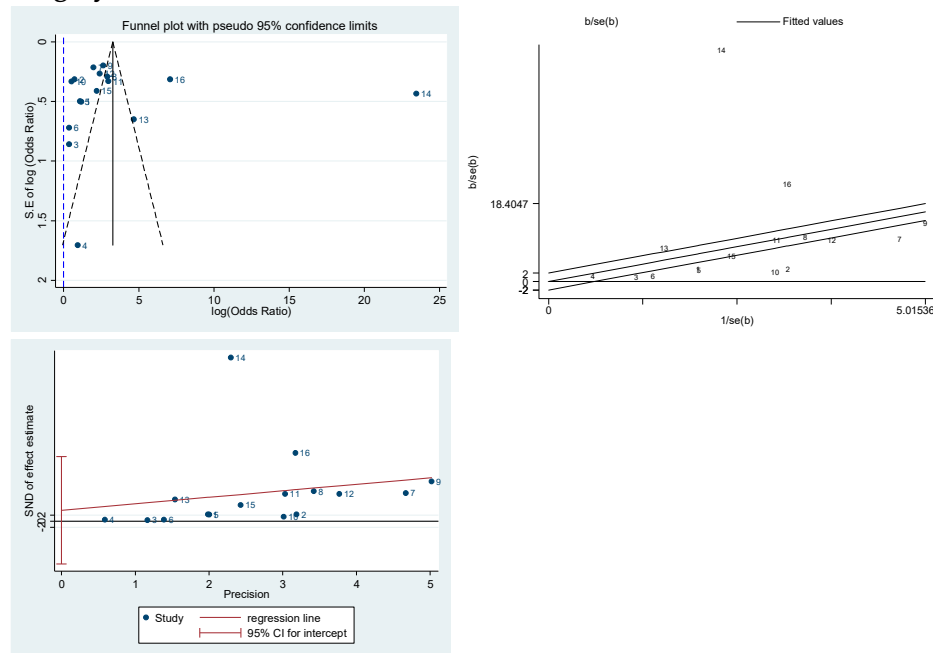

Figure S1A: Funnel plot for studies included in the pooled analysis for Grade 3 and 4 Adverse Effects; S1B: Galbraith's plot for studies included in this analysis; S1C: Egger's plot for studies included in this analysis

| study | author                               | drug                       | drugtype                               |
|-------|--------------------------------------|----------------------------|----------------------------------------|
| 1     | Rinke et al. 2009 (PROMID)           | Octreotide LAR             | Somatostatin Analogues (SSAs)          |
| 2     | Caplin et al. 2014 (CLARINET)        | Lanreotide                 | Somatostatin Analogues (SSAs)          |
| 3     | Vinik et al. 2016 (ELECT)            | Lanreotide                 | Somatostatin Analogues (SSAs)          |
| 4     | Kulke et al. 2014 (Telotristat etipr | Telotristat etiprate       | Tryptophan Hydroxylase (TPH) inhibitor |
| 5     | Kulke et al. 2017 (TELESTAR)         | Telotristat etiprate       | Tryptophan Hydroxylase (TPH) inhibitor |
| 6     | Pavel et al. 2018 (telotristat ethyl | Telotristat ethyl (TELECAS | Tryptophan Hydroxylase (TPH) inhibitor |
| 7     | Yao et al. 2011 (RADIANT-3)          | Everolimus                 | mTOR inhibitors                        |
| 8     | Yao et al. 2016 (RADIANT-4)          | Everolimus                 | mTOR inhibitors                        |
| 9     | Pavel et al. 2017 (RADIANT-2)        | Everolimus+octreotide      | mTOR inhibitors                        |
| 10    | Raymond et al. 2011 (Sunitinib)      | Sunitinib                  | Tyrosine Kinase Inhibitors (TKI)       |
| 11    | Wells et al. 2012 (ZETA)             | Vandetanib                 | Tyrosine Kinase Inhibitors (TKI)       |
| 12    | Schlumberger et al. 2017 (EXAM)      | Cabozatinib                | Tyrosine Kinase Inhibitors (TKI)       |
| 13    | Bergsland et al. 2019 (NSC# 73775    | Pazopanib Hydrochloride    | Tyrosine Kinase Inhibitors (TKI)       |
| 14    | Xu et al. 2020 (Surufatinib_SANET    | Surufatinib (SANET-p)      | Tyrosine Kinase Inhibitors (TKI)       |
| 15    | Xu et al. 2020 (Surufatinib_SANet    | Surufatinib (SANET-p)      | Tyrosine Kinase Inhibitors (TKI)       |
| 16    | Carbonero et al. 2021 (Octreotide    | Axinitib (Axinet)          | Tyrosine Kinase Inhibitors (TKI)       |

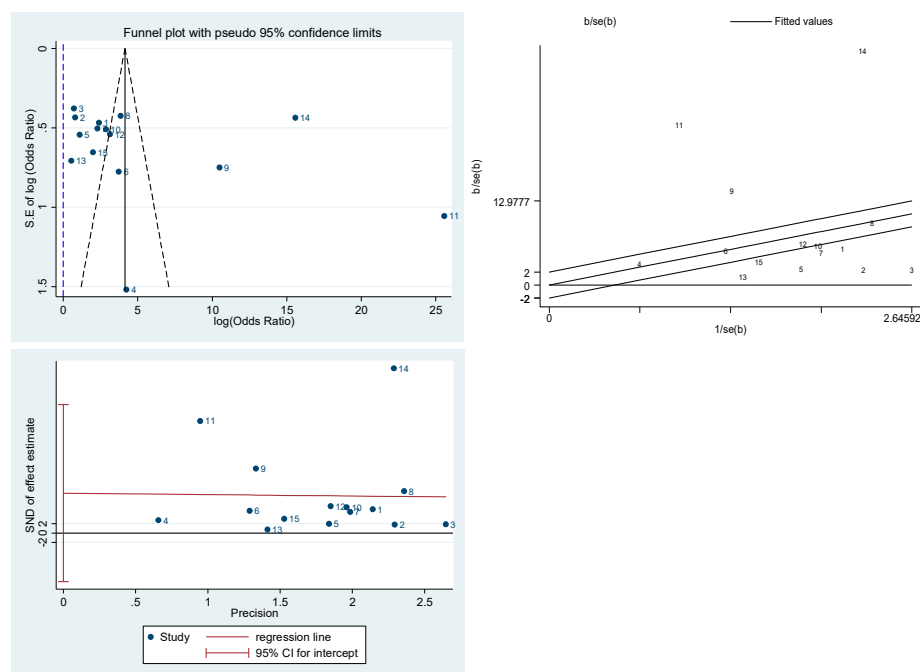

Figure S2A: Funnel plot for studies included in the pooled analysis for all Grade Adverse Effects; S2B: Galbraith's plot for studies included in this analysis; S2C: Egger's plot for studies included in this analysis

| study | author                                                      | drug                         | drugtype                                |
|-------|-------------------------------------------------------------|------------------------------|-----------------------------------------|
| 1     | Rinke et al. 2009 (PROMID)                                  | Octreotide LAR               | Somatostatin Analogues (SSAs)           |
| 2     | Caplin et al. 2014 (CLARINET)                               | Lanreotide                   | Somatostatin Analogues (SSAs)           |
| 3     | Vinik et al. 2016 (ELECT)                                   | Lanreotide                   | Somatostatin Analogues (SSAs)           |
| 4     | Kulke et al. 2014 (Telotristat etipr)                       | Telotristat etiprate         | Tryptophan Hydroxylase (TPH) inhibitors |
| 5     | Kulke et al. 2017 (TELESTAR)                                | Telotristat etiprate         | Tryptophan Hydroxylase (TPH) inhibitors |
| 6     | Pavel et al. 2018 (telotristat ethyl)                       | Telotristat ethyl (TELECAST) | Tryptophan Hydroxylase (TPH) inhibitors |
| 7     | Yao et al. 2011 (RADIANT-3)                                 | Everolimus                   | mTOR inhibitors                         |
| 8     | Yao et al. 2016 (RADIANT-4)                                 | Everolimus                   | mTOR inhibitors                         |
| 9     | Pavel et al. 2017 (RADIANT-2)                               | Everolimus+octreotide        | mTOR inhibitors                         |
| 10    | Raymond et al. 2011 (Sunitinib)                             | Sunitinib                    | Tyrosine Kinase Inhibitors (TKI)        |
| 11    | Wells et al. 2012 (ZETA)                                    | Vandetanib                   | Tyrosine Kinase Inhibitors (TKI)        |
| 12    | Schlumberger et al. 2017 (EXAM)                             | Cabozantinib                 | Tyrosine Kinase Inhibitors (TKI)        |
| 13    | Bergsland et al. 2019 (NSC# 73775+ Pazopanib Hydrochloride) | Pazopanib Hydrochloride      | Tyrosine Kinase Inhibitors (TKI)        |
| 14    | Xu et al. 2020 (Surufatinib_Sanet- Surufatinib (SANET-p))   | Surufatinib                  | Tyrosine Kinase Inhibitors (TKI)        |
| 15    | Xu et al. 2020 (Surufatinib_SANET-Surufatinib (SANET-p))    | Surufatinib                  | Tyrosine Kinase Inhibitors (TKI)        |

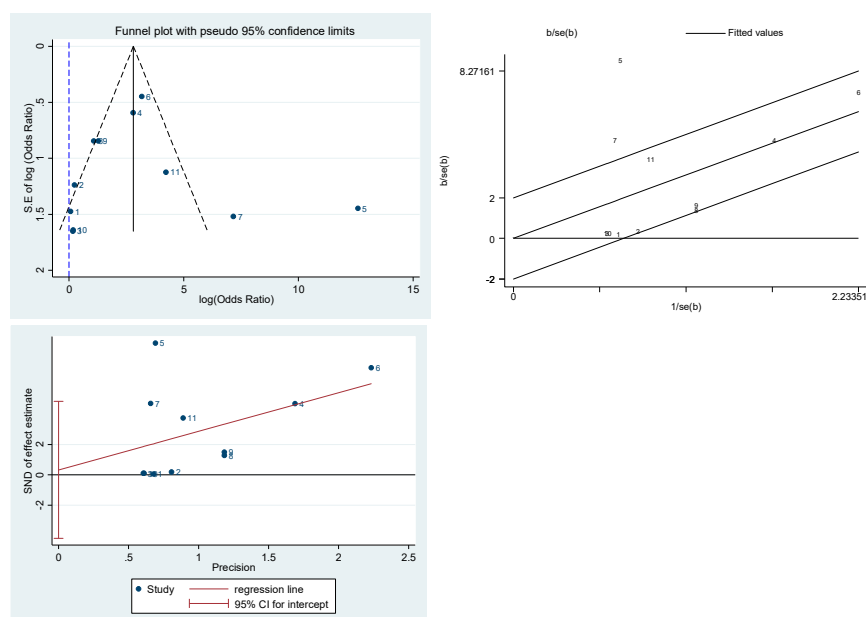

Figure S3A: Funnel plot for studies included in the pooled analysis for Grade 3 and 4 Cardiac Adverse Effects; S3B: Galbraith's plot for studies included in this analysis; S3C: Egger's plot for studies included in this analysis

| study | author                                           | drug         | drugtype                         |
|-------|--------------------------------------------------|--------------|----------------------------------|
| 1     | Caplin et al. 2014 (CLARINET)                    | Lanreotide   | Somatostatin Analogues (SSAs)    |
| 2     | Kulke et al. 2017 (TELESTAR)                     | Telotristat  | Tryptophan Hydroxylase (TPH)     |
| 3     | Pavel et al. 2018 (telotristat ethyl)            | Telotristat  | Tryptophan Hydroxylase (TPH)     |
| 4     | Yao et al. 2011 (RADIANT-3)                      | Everolimus   | mTOR inhibitors                  |
| 5     | Yao et al. 2016 (RADIANT-4)                      | Everolimus   | mTOR inhibitors                  |
| 6     | Pavel et al. 2017 (RADIANT-2)                    | Everolimus   | mTOR inhibitors                  |
| 7     | Raymond et al. 2011 (Sunitinib)                  | Sunitinib    | Tyrosine Kinase Inhibitors (TKI) |
| 8     | Wells et al. 2012 (ZETA)                         | Vandetanib   | Tyrosine Kinase Inhibitors (TKI) |
| 9     | Schlumberger et al. 2017 (EXAM)                  | Cabozantinib | Tyrosine Kinase Inhibitors (TKI) |
| 10    | Xu et al. 2020 (Surufatinib_Sanet-ε Surufatinib) | Surufatinib  | Tyrosine Kinase Inhibitors (TKI) |
| 11    | Carbonero et al. 2021 (Octreotide_Axinitib)      | Octreotide   | Tyrosine Kinase Inhibitors (TKI) |

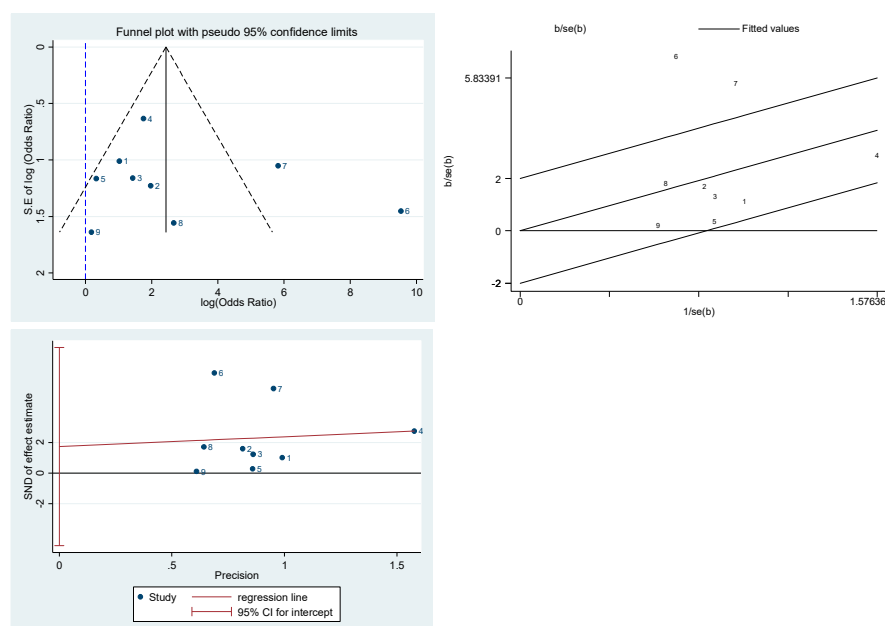

Figure S4A: Funnel plot for studies included in the pooled analysis for Grade 3 and 4 Vascular Adverse Effects; S4B: Galbraith's plot for studies included in this analysis; S4C: Egger's plot for studies included in this analysis

| study | author                                           | drug         | drugtype                         |
|-------|--------------------------------------------------|--------------|----------------------------------|
| 1     | Caplin et al. 2014 (CLARINET)                    | Lanreotide   | Somatostatin Analogues (SSAs)    |
| 2     | Yao et al. 2011 (RADIANT-3)                      | Everolimus   | mTOR inhibitors                  |
| 3     | Yao et al. 2016 (RADIANT-4)                      | Everolimus   | mTOR inhibitors                  |
| 4     | Pavel et al. 2017 (RADIANT-2)                    | Everolimus   | mTOR inhibitors                  |
| 5     | Raymond et al. 2011 (Sunitinib)                  | Sunitinib    | Tyrosine Kinase Inhibitors (TKI) |
| 6     | Wells et al. 2012 (ZETA)                         | Vandetanib   | Tyrosine Kinase Inhibitors (TKI) |
| 7     | Schlumberger et al. 2017 (EXAM)                  | Cabozantinib | Tyrosine Kinase Inhibitors (TKI) |
| 8     | Xu et al. 2020 (Surufatinib_SANET-Surufatinib)   | Surufatinib  | Tyrosine Kinase Inhibitors (TKI) |
| 9     | Xu et al. 2020 (Surufatinib_Sanet-ε Surufatinib) | Surufatinib  | Tyrosine Kinase Inhibitors (TKI) |

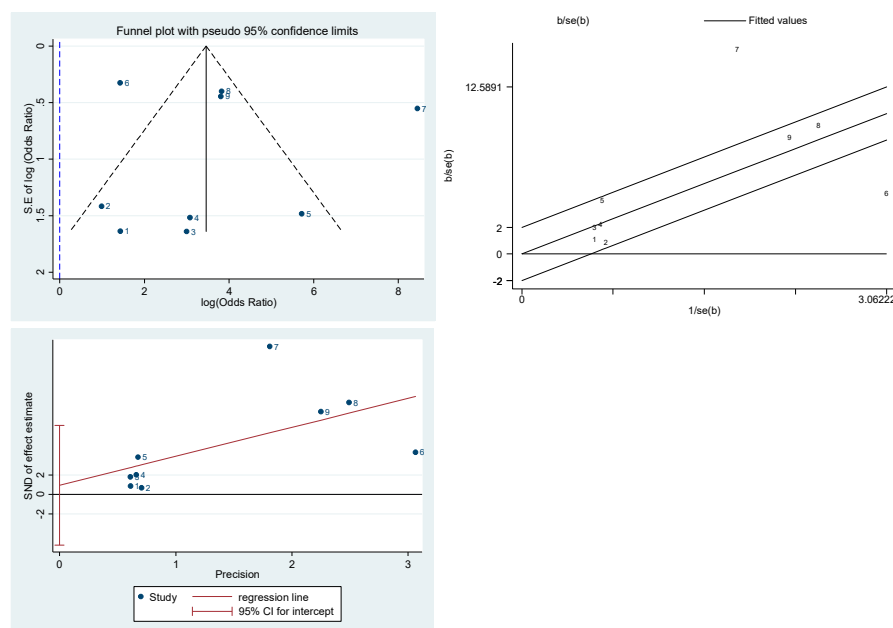

Figure S5A: Funnel plot for studies included in the pooled analysis for treatment-related Hypertension; S5B: Galbraith's plot for studies included in this analysis; S5C: Egger's plot for studies included in this analysis

| study | author                           | drug        | drugtype                         |
|-------|----------------------------------|-------------|----------------------------------|
| 1     | Yao et al. 2016 (RADIANT-4)      | Everolimu   | mTOR inhibitors                  |
| 2     | Pavel et al. 2017 (RADIANT-2)    | Everolimu   | mTOR inhibitors                  |
| 3     | Raymond et al. 2011 (Sunitinib)  | Sunitinib   | Tyrosine Kinase Inhibitors (TKI) |
| 4     | Wells et al. 2012 (ZETA)         | Vandetanib  | Tyrosine Kinase Inhibitors (TKI) |
| 5     | Schlumberger et al. 2017 (EXAN)  | Cabozatin   | Tyrosine Kinase Inhibitors (TKI) |
| 6     | Bergsland et al. 2019 (NSC# 73)  | Pazopanib   | Tyrosine Kinase Inhibitors (TKI) |
| 7     | Xu et al. 2020 (Surufatinib_SAN) | Surufatinib | Tyrosine Kinase Inhibitors (TKI) |
| 8     | Xu et al. 2020 (Surufatinib_San) | Surufatinib | Tyrosine Kinase Inhibitors (TKI) |
| 9     | Carbonero et al. 2021 (Octreoti) | Axitinib    | Tyrosine Kinase Inhibitors (TKI) |

**Table 1.** Patient and tumor characteristics.

| Study                                          | Drug                 | Primary tumor site | Grading (% of patients included)                     | Functional tumors [%]                                      | Females [%]          | Median or mean age [years]                      |
|------------------------------------------------|----------------------|--------------------|------------------------------------------------------|------------------------------------------------------------|----------------------|-------------------------------------------------|
| <b>SSAs</b>                                    |                      |                    |                                                      |                                                            |                      |                                                 |
| Caplin et al. 2014 (CLARINET).                 | Lanreotide           | GI, Lung           | G1 (68), G2 (32)<br>G1 (70), G2 (28),<br>unknown (2) | 2<br>2                                                     | 48<br>48             | Mean:<br>63<br>Mean:<br>62                      |
| Rinke et al. 2009 (PROMID).                    | Octreotide LAR       | GI                 | G1 (98), G2 (2) G1 (93), G2 (7)                      | 41<br>37                                                   | 52<br>47             | Median:<br>64<br>Median:<br>61                  |
| Vinik et al. 2016 (ELECT).                     | Lanreotide           | Pancreas           | No                                                   | Any (95), extrahepatic (24)<br>Any (94), extrahepatic (40) | 51<br>53             | Median:<br>56<br>Median:<br>57                  |
| <b>Tryptophan Hydroxylase (TPH) inhibitors</b> |                      |                    |                                                      |                                                            |                      |                                                 |
| Kulke et al. 2017 (TELESTAR).                  | Telotristat etiprate | Carcinoid Tumors   | n.d.                                                 | n.d.<br>n.d.                                               | 46.7<br>53.3<br>44.4 | Mean:<br>63.3<br>Mean:<br>62.4<br>Mean:<br>64.9 |

|                                        |                            |                                   |                                                                                        |              |                       |                                                                |
|----------------------------------------|----------------------------|-----------------------------------|----------------------------------------------------------------------------------------|--------------|-----------------------|----------------------------------------------------------------|
| Pavel et al.<br>2018<br>(TELECAST).    | Telotristat<br>ethyl       | Carcinoid<br>Tumors               | n.d.                                                                                   | n.d.         | 50<br>44<br>40        | Mean:<br>62.2<br>Mean:<br>63.6<br>Mean:<br>62.7                |
| Kulke et al.<br>2014                   | Telotristat<br>etiprate    | Carcinoid<br>Tumors               | n.d.<br>n.d.                                                                           | n.d.<br>n.d. | 2<br>3<br>1<br>2<br>4 | Mean:62.4<br>Mean: 51.7<br>Mean:61.0<br>Mean:52.7<br>Mean:65.7 |
| <b>mTOR<br/>inhibitors</b>             |                            |                                   |                                                                                        |              |                       |                                                                |
| Pavel et al.<br>2017<br>(RADIANT-2).   | Everolimus+oc<br>treotide  | Pancreas, GI,<br>lung, other      | G1 (77), G2 (18),<br>G3 (0), unknown<br>(5)<br>G1 (82), G2 (14),<br>G3 (0), unknown(3) | 79<br>81     | 55<br>42              | Median:<br>60<br>Median:<br>60                                 |
| Yao et al. 2011<br>(RADIANT-3).        | Everolimus                 | GI, Lung,<br>other                | G1 (63), G2 (37),<br>unknown (0)<br>G1 (67), G2 (33)                                   | 0<br>0       | 57<br>45              | Median:<br>65<br>Median:<br>60                                 |
| Yao et al. 2016<br>(RADIANT-4).        | Everolimus                 | GI , other                        | G1 (85), G2 (15)<br>G1 (84), G2 (15)                                                   | 59<br>66     | 55<br>49              | Median:<br>61<br>Median:<br>61                                 |
| <b>TKI</b>                             |                            |                                   |                                                                                        |              |                       |                                                                |
| Raymond et al.<br>2011                 | Sunitinib                  | Pancreas                          | G1 (8), G2 (34),<br>n.a. (58)<br>G1 (7), G2 (35),<br>n.a. (58)                         | 29<br>25     | 51<br>53              | Median:<br>56<br>Median:<br>57                                 |
| Wells et al.<br>2011<br>(ZETA)         | Vandetanib                 | Medullary<br>thyroid<br>carcinoma | n.a.                                                                                   | n.d.         | 42<br>44              | Mean: 50.7<br>Mean : 50.3                                      |
| Schlumberger<br>et al. 2017<br>(EXAM). | Cabozatinib                | Medullary<br>thyroid<br>carcinoma | n.a.                                                                                   | n.a.         | 31.1<br>36.9          | Mean: 54.4                                                     |
| Xu et al. 2020<br>(SANET-p).           | Surufatinib                | Pancreas                          | G1(14), G2(99)                                                                         | 10<br>5      | 47<br>53              | Median:<br>51                                                  |
| Carbonero et<br>al.<br>2021(Axinet)    | Axinitib                   | Extra-<br>pancreatic<br>NETs      | G1,G2                                                                                  | n.a.         | 48<br>48              | Median:61                                                      |
| Bergland et al<br>2019                 | Pazopanib<br>Hydrochloride | Carcinoid<br>Tumors               | G1                                                                                     | n.a.         | 64.9<br>44.6          | Median:<br>63                                                  |
| Xu et al. 2020<br>(SANET-ep).          | Surufatinib                | Extra-<br>pancreatic<br>NETs      | G1 (16), G2 (84)<br>G1 (16), G2 (84)                                                   | 4<br>3       | 43<br>49              | Median:<br>52<br>Median:<br>54                                 |

Abbreviations. mTOR: mechanistic target of rapamycin; NET: neuroendocrine tumor; n.a.: non available; SSAs: somatostatin analogs; TKI: tyrosine kinase inhibitor; TPH: tryptophan hydroxylase

## Supplementary Table 2. Search Strategy

| Search terms in MEDLINE |    |                                                                                                                                                                                                                                                                                                                                                                                                                                         | Number of references |
|-------------------------|----|-----------------------------------------------------------------------------------------------------------------------------------------------------------------------------------------------------------------------------------------------------------------------------------------------------------------------------------------------------------------------------------------------------------------------------------------|----------------------|
| Neuroendocrine Tumors   |    |                                                                                                                                                                                                                                                                                                                                                                                                                                         |                      |
|                         | 1  | (neuroendocrine adj4 (tumo?r* OR neoplas* OR cancer* OR carcinom* OR malignanc*)).ab,kf,ti.                                                                                                                                                                                                                                                                                                                                             | 23,009               |
|                         | 2  | neuroendocrine tumors/ OR adenoma, acidophil/ OR adenoma, basophil/ OR adenoma, chromophobe/ OR apudoma/ OR carcinoid tumor/ OR malignant carcinoid syndrome/ OR carcinoma, neuroendocrine/ OR somatostatinoma/ OR vipoma/ OR Multiple Endocrine Neoplasia Type 1/ OR carcinoma, medullary/ OR carcinoma, merkel cell/ OR exp neurilemmoma/ OR exp paraganglioma/ OR pheochromocytoma/                                                  | 77,106               |
|                         | 3  | ((carcinom* adj2 medulla*) OR (cancer adj2 medulla*) OR (tumo?r* adj2 medulla*)).ab,kf,ti.                                                                                                                                                                                                                                                                                                                                              | 9,051                |
|                         | 4  | adenoma, islet cell/ OR insulinoma/ OR carcinoma, islet cell/ OR gastrinoma/ OR glucagonoma/                                                                                                                                                                                                                                                                                                                                            | 9,577                |
|                         | 5  | (pNET OR PanNEN OR PanNET OR 'Non functioning pancreatic endocrine tumo?r*' OR 'Non-functioning pancreatic endocrine tumo?r*' OR 'adenoma islet cell' OR insulinoma* OR 'carcinom* islet cell' OR gastrinoma* OR glucagonoma* OR 'Zollinger Ellison Syndrome' OR 'pancreasislet cell tumo?r*' OR 'pancreas islet cell carcinom*').ab,kf,ti.                                                                                             | 12,836               |
|                         | 6  | (lungcarcinoid* OR carcinoid* OR somatostatinoma* OR vipoma* OR apudoma* OR (adenoma* adj2 chromophobe)OR (adenoma* adj2 basophil*) OR (adenoma* adj2 acidophil*) OR "Multiple Endocrine Neoplasia Type 1" OR "MEN 1" OR Neurilemmoma* OR Neurilemoma* OR Schwannoma* OR Neurinoma* OR Schwannomatosis OR Schwannomatoses OR Paraganglioma* ORPheochromocytoma*).ab,kf,ti.                                                              | 62,061               |
|                         | 7  | (merk* adj4 (tumo?r* OR cancer OR carcinom*)).ab,kf,ti.                                                                                                                                                                                                                                                                                                                                                                                 | 3,521                |
|                         | 8  | ("Gastro-enteropancreatic neuroendocrine tumor" OR "Thyroid cancer, medullary").mp.                                                                                                                                                                                                                                                                                                                                                     | 1,346                |
|                         | 9  | 1 OR 2 OR 3 OR 4 OR 5 OR 6 OR 7 OR 8                                                                                                                                                                                                                                                                                                                                                                                                    | 123,208              |
| Therapeutics            |    |                                                                                                                                                                                                                                                                                                                                                                                                                                         |                      |
|                         | 10 | exp Therapeutics/ OR exp Antineoplastic Agents/                                                                                                                                                                                                                                                                                                                                                                                         | 5,356,195            |
|                         | 11 | (therap* OR radiotherap* OR radiofrequency ablat* OR radio-frequency ablat* OR radio frequency ablat* OR RFablat* OR thermoablat* OR local ablat* OR transarterial emboli?ation OR transarterial emboli?ation OR transarterial chemoemboli?ation OR transarterial chemoemboli?ation ORradioemboli?ation OR somatostatin OR telotristat OR interferon OR chemotherap* OR peptide recept OR radiotherap* OR targeted molecular therap* OR | 3,507,527            |

|                                      |    |                                                                                                                                                                               |           |
|--------------------------------------|----|-------------------------------------------------------------------------------------------------------------------------------------------------------------------------------|-----------|
|                                      |    | immunotherap* OR radiopeptide OR DOTATOC OR DOTATATE OR PRRT).ab,kf,ti.                                                                                                       |           |
|                                      | 12 | Lutetium/ OR (lutetium OR edotreotide).mp.                                                                                                                                    | 2,133     |
|                                      | 13 | (radiopeptide* OR "peptide receptor radionuclear therapy" OR OCTREOTATE OR DOTA OR <sup>177</sup> Lu OR Lu <sup>177</sup> OR "Lu-177" OR "177-Lu" OR Lutetium177).ab,kf,ti.   | 5,430     |
|                                      | 14 | 10 OR 11 OR 12 OR 13                                                                                                                                                          | 7,381,126 |
|                                      | 15 | 9 AND 14                                                                                                                                                                      | 35,499    |
|                                      | 16 | (randomized OR placebo OR randomly OR trial OR groups).ab.                                                                                                                    | 2,909,354 |
|                                      | 17 | drug therapy.ab,kf,ti.                                                                                                                                                        | 49,,229   |
|                                      | 18 | (controlled clinical trial OR randomized controlled trial).pt.                                                                                                                | 606,435   |
|                                      | 19 | 16 OR 17 OR 18                                                                                                                                                                | 3,093,740 |
|                                      | 20 | exp animals/ NOT humans.sh.                                                                                                                                                   | 4,757,420 |
|                                      | 21 | 19 NOT 20                                                                                                                                                                     | 2,643,945 |
| Combined sets                        |    |                                                                                                                                                                               |           |
|                                      | 22 | 15 AND 21                                                                                                                                                                     | 2,786     |
| Limits: Randomized controlled trials |    |                                                                                                                                                                               |           |
|                                      | 23 | limit 22 to (clinical trial, phase i OR clinical trial, phase ii OR clinical trial OR case reports OR editorial OR letter OR metaanalysis OR "review" OR "systematic review") | 1,167     |
|                                      | 24 | 22 NOT 23                                                                                                                                                                     | 1,619     |
|                                      | 25 | limit 15 to ("in data review" OR in process OR "pubmed not medline")                                                                                                          | 3,295     |
|                                      | 26 | (random* OR group* OR trial* OR placebo OR phase III OR phase IV OR controlled).ab,kf,ti.                                                                                     | 5,297,601 |
|                                      | 27 | 25 AND 26                                                                                                                                                                     | 738       |
|                                      | 28 | limit 27 to (case reports or "review")                                                                                                                                        | 222       |
|                                      | 29 | 27 NOT 28                                                                                                                                                                     | 516       |
|                                      | 30 | 24 OR 29                                                                                                                                                                      | 1,916     |

| Search terms in Embase |    |                                             | Number of references |
|------------------------|----|---------------------------------------------|----------------------|
| Neuroendocrine tumors  |    |                                             |                      |
|                        | 1. | (neuroendocrine NEAR/4 tumo\$r*):ti,ab,kw   | 29,104               |
|                        | 2. | (neuroendocrine NEAR/4 cancer*):ti,ab,kw    | 3,100                |
|                        | 3. | (neuroendocrine NEAR/4 neoplas*):ti,ab,kw   | 4,240                |
|                        | 4. | (neuroendocrine NEAR/4 carcinom*):ti,ab,kw  | 9,793                |
|                        | 5. | (neuroendocrine NEAR/4 malignanc*):ti,ab,kw | 621                  |
|                        | 6. | (adenoma* NEAR/2 acidophil):ti,ab,kw        | 33                   |
|                        | 7. | (adenoma* NEAR/2 basophil):ti,ab,kw         | 28                   |
|                        | 8. | (adenoma* NEAR/2 chromophobe):ti,ab,kw      | 590                  |

|              |                                                                                                                                                                                                                                                                                                                                                                                                                                                                                                                                                            |           |
|--------------|------------------------------------------------------------------------------------------------------------------------------------------------------------------------------------------------------------------------------------------------------------------------------------------------------------------------------------------------------------------------------------------------------------------------------------------------------------------------------------------------------------------------------------------------------------|-----------|
| 9.           | 'gastroenteropancreatic neuroendocrine tumor'/exp<br>OR 'neuroendocrine carcinoma'/exp OR 'paraganglioma'/deOR 'carotid body tumor'/de OR<br>'thyroid carcinoma'/de<br>OR 'bronchus carcinoid'/de OR 'carcinoid syndrome'/deOR 'gastrointestinal carcinoid'/exp<br>OR 'apudoma'/de<br>OR 'vipoma'/de OR 'somatostatinoma'/de OR 'medullarycarcinoma'/de OR 'thyroid medullary<br>carcinoma'/de<br>OR 'neurilemoma'/de OR 'adrenal medulla tumor'/de<br>OR 'pheochromocytoma'/de OR 'neuroendocrine tumor'/deOR 'multiple endocrine neoplasia<br>type 1'/de | 128,860   |
| 10.          | lungcarcinoid*:ti,ab,kw OR carcinoid*:ti,ab,kw<br>OR somatostatinoma*:ti,ab,kw OR vipoma*:ti,ab,kw OR apudoma*:ti,ab,kw OR<br>neurilemoma*:ti,ab,kw OR neurilemoma*:ti,ab,kw OR schwannoma*:ti,ab,kwOR<br>neurinoma*:ti,ab,kw OR schwannomatosis:ti,ab,kw<br>OR schwannomatosis:ti,ab,kw OR paraganglioma*:ti,ab,kwOR pheochromocytoma*:ti,ab,kw<br>OR 'multiple endocrine neoplasia type 1':ti,ab,kw OR 'men 1':ti,ab,kw OR 'pancreasislet cell<br>tumo\$r*:ti,ab,kw OR 'pancreas islet cell<br>carcinom*:ti,ab,kw                                        | 81,383    |
| 11.          | ((carcinom* NEAR/2 medulla*):ti,ab,kw) OR ((cancer NEAR/2<br>medulla*):ti,ab,kw) OR ((tumo\$r*<br>NEAR/2 medulla*):ti,ab,kw)                                                                                                                                                                                                                                                                                                                                                                                                                               | 12,065    |
| 12.          | (merk* NEAR/4 tumo\$r*):ti,ab,kw                                                                                                                                                                                                                                                                                                                                                                                                                                                                                                                           | 662       |
| 13.          | (merk* NEAR/4 cancer):ti,ab,kw                                                                                                                                                                                                                                                                                                                                                                                                                                                                                                                             | 241       |
| 14.          | (merk* NEAR/4 carcinom*):ti,ab,kw                                                                                                                                                                                                                                                                                                                                                                                                                                                                                                                          | 4,621     |
| 15.          | 'pnet':ti,ab,kw OR 'pannen':ti,ab,kw OR 'pannet':ti,ab,kw OR 'non-functioning pancreatic<br>endocrine tumo\$r*:ti,ab,kw<br>OR 'adenoma islet cell*':ti,ab,kw OR insulinoma:ti,ab,kw OR 'carcinoma islet<br>cell*':ti,ab,kw OR gastrinoma:ti,ab,kwOR glucagonoma:ti,ab,kw OR 'zollinger ellison<br>syndrome':ti,ab,kw                                                                                                                                                                                                                                       | 17,592    |
| 16.          | 'insulinoma'/de OR 'gastrinoma'/de OR 'glucagonoma'/de<br>OR 'pancreas islet cell carcinoma'/exp OR 'pancreas islet celltumor'/exp                                                                                                                                                                                                                                                                                                                                                                                                                         | 24,540    |
| 17.          | 1 OR 2 OR 3 OR 4 OR 5 OR 6 OR 7 OR 8 OR 9 OR<br>10 OR 11 OR 12 OR 13 OR 14 OR 15 OR 16                                                                                                                                                                                                                                                                                                                                                                                                                                                                     | 185,410   |
| Therapeutics |                                                                                                                                                                                                                                                                                                                                                                                                                                                                                                                                                            |           |
| 18.          | 'therapy'/de OR 'cancer therapy'/exp OR 'drug therapy'/exp OR 'nonsurgical invasive<br>therapy'/exp OR 'radiotherapy'/exp<br>OR 'therapy effect'/exp OR 'antineoplastic agent'/exp                                                                                                                                                                                                                                                                                                                                                                         | 5,950,651 |
| 19.          | 'lutetium'/de OR 'lutetium 177'/de OR 'edotreotide'/de                                                                                                                                                                                                                                                                                                                                                                                                                                                                                                     | 5,456     |
| 20.          | lutetium:ti,ab,kw OR lutetium177:ti,ab,kw<br>OR edotreotide:ti,ab,kw OR radiopeptide*:ti,ab,kw<br>OR dotatoc:ti,ab,kw OR dotatate:ti,ab,kw OR prrt:ti,ab,kw OR 'peptide receptor<br>radionuclear therapy':ti,ab,kw                                                                                                                                                                                                                                                                                                                                         | 12,706    |



|                                      |     |                                                                                                                                                                                                                                                                                                                                                                                                                                                                                                                                                                                                                                                                       |            |
|--------------------------------------|-----|-----------------------------------------------------------------------------------------------------------------------------------------------------------------------------------------------------------------------------------------------------------------------------------------------------------------------------------------------------------------------------------------------------------------------------------------------------------------------------------------------------------------------------------------------------------------------------------------------------------------------------------------------------------------------|------------|
|                                      |     | OR octreotate:ti,ab,kw OR dota:ti,ab,kw OR 177lu:ti,ab,kw<br>OR lu177:ti,ab,kw OR 'lu-177':ti,ab,kw OR '177-lu':ti,ab,kw                                                                                                                                                                                                                                                                                                                                                                                                                                                                                                                                              |            |
|                                      | 21. | therap* OR radiotherap* OR 'radiofrequency ablat*':ab,kw,ti OR 'radio-frequency ablat*':ab,kw,ti<br>OR 'radio frequency ablat*':ab,kw,ti OR rfablat*':ab,kw,ti<br>OR thermoablat*':ab,kw,ti OR 'local ablat*':ab,kw,ti OR 'transarterial emboli\$ation':ab,kw,ti<br>OR 'transarterial chemoemboli\$ation':ab,kw,ti OR radioemboli\$ation:ab,kw,ti OR<br>somatostatin:ab,kw,ti OR telotristat:ab,kw,ti<br>OR interferon:ab,kw,ti OR chemotherap*':ab,kw,ti<br>OR 'peptide receptor radiotherap*':ab,kw,ti OR 'targeted molecular therap*':ab,kw,ti OR<br>immunotherap*':ab,kw,ti OR radiopeptide:ab,kw,ti OR dotatoc:ab,kw,ti<br>OR dotatate:ab,kw,ti OR prrt:ab,kw,ti | 10,160,908 |
|                                      | 22. | 18 OR 19 OR 20 OR 21                                                                                                                                                                                                                                                                                                                                                                                                                                                                                                                                                                                                                                                  | 11,358,892 |
| Combined sets                        |     |                                                                                                                                                                                                                                                                                                                                                                                                                                                                                                                                                                                                                                                                       |            |
|                                      | 23. | 17 AND 22                                                                                                                                                                                                                                                                                                                                                                                                                                                                                                                                                                                                                                                             | 80,754     |
| Limits: Randomized controlled trials |     |                                                                                                                                                                                                                                                                                                                                                                                                                                                                                                                                                                                                                                                                       |            |
|                                      | 24. | 'drug therapy':ab,kw,ti                                                                                                                                                                                                                                                                                                                                                                                                                                                                                                                                                                                                                                               | 59,407     |
|                                      | 25. | ((single OR double OR treble OR triple) NEAR/5<br>(blind* OR mask OR masked)):ti,ab,kw                                                                                                                                                                                                                                                                                                                                                                                                                                                                                                                                                                                | 249,190    |
|                                      | 26. | placebo:ti,ab,kw OR 'double blind':ti,ab,kw OR 'single blind':ti,ab,kw OR (((random* OR<br>controlled)<br>NEAR/5 trial*):ti,ab,kw) OR ((allocat* NEAR/5<br>random):ti,ab,kw)                                                                                                                                                                                                                                                                                                                                                                                                                                                                                          | 860,099    |
|                                      | 27. | 'controlled clinical trial'/exp OR 'randomized controlled<br>trial'/exp                                                                                                                                                                                                                                                                                                                                                                                                                                                                                                                                                                                               | 802,339    |
|                                      | 28. | 24 OR 25 OR 26 OR 27                                                                                                                                                                                                                                                                                                                                                                                                                                                                                                                                                                                                                                                  | 1,253,059  |
|                                      | 29. | 23 AND 28                                                                                                                                                                                                                                                                                                                                                                                                                                                                                                                                                                                                                                                             | 3,820      |
| Excluded                             |     |                                                                                                                                                                                                                                                                                                                                                                                                                                                                                                                                                                                                                                                                       |            |
|                                      | 30. | ([conference abstract]/lim OR [conference paper]/lim OR [conference review]/lim OR [data<br>papers]/lim OR [editorial]/lim OR [letter]/lim OR [note]/lim OR [review]/lim<br>OR [short survey]/lim)                                                                                                                                                                                                                                                                                                                                                                                                                                                                    |            |
|                                      | 31. | 29 NOT 30                                                                                                                                                                                                                                                                                                                                                                                                                                                                                                                                                                                                                                                             | 1,302      |

| Search terms in Cochrane via Wiley |                                                                                                                                                                                                                                                                                                                                                          |  | Number of references |
|------------------------------------|----------------------------------------------------------------------------------------------------------------------------------------------------------------------------------------------------------------------------------------------------------------------------------------------------------------------------------------------------------|--|----------------------|
| Neuroendocrine tumors              |                                                                                                                                                                                                                                                                                                                                                          |  |                      |
| 1                                  | MeSH descriptor: [Neuroendocrine Tumors] this term only                                                                                                                                                                                                                                                                                                  |  | 161                  |
| 2                                  | MeSH descriptor: [Adenoma, Acidophil] this term only                                                                                                                                                                                                                                                                                                     |  | 0                    |
| 3                                  | MeSH descriptor: [Adenoma, Basophil] this term only                                                                                                                                                                                                                                                                                                      |  | 0                    |
| 4                                  | MeSH descriptor: [Adenoma, Chromophobe] this term only                                                                                                                                                                                                                                                                                                   |  | 1                    |
| 5                                  | MeSH descriptor: [Apudoma] this term only                                                                                                                                                                                                                                                                                                                |  | 0                    |
| 6                                  | MeSH descriptor: [Carcinoid Tumor] this term only                                                                                                                                                                                                                                                                                                        |  | 85                   |
| 7                                  | MeSH descriptor: [Malignant Carcinoid Syndrome] this term only                                                                                                                                                                                                                                                                                           |  | 41                   |
| 8                                  | MeSH descriptor: [Carcinoma, Neuroendocrine] this term only                                                                                                                                                                                                                                                                                              |  | 50                   |
| 9                                  | MeSH descriptor: [Somatostatinoma] this term only                                                                                                                                                                                                                                                                                                        |  | 3                    |
| 10                                 | MeSH descriptor: [Vipoma] this term only                                                                                                                                                                                                                                                                                                                 |  | 2                    |
| 11                                 | MeSH descriptor: [Multiple Endocrine Neoplasia Type 1] this term only                                                                                                                                                                                                                                                                                    |  | 8                    |
| 12                                 | MeSH descriptor: [Carcinoma, Medullary] this term only                                                                                                                                                                                                                                                                                                   |  | 15                   |
| 13                                 | MeSH descriptor: [Carcinoma, Merkel Cell] this term only                                                                                                                                                                                                                                                                                                 |  | 17                   |
| 14                                 | MeSH descriptor: [Neurilemmoma] explode all trees                                                                                                                                                                                                                                                                                                        |  | 73                   |
| 15                                 | MeSH descriptor: [Paraganglioma] explode all trees                                                                                                                                                                                                                                                                                                       |  | 64                   |
| 16                                 | MeSH descriptor: [Pheochromocytoma] this term only                                                                                                                                                                                                                                                                                                       |  | 61                   |
| 17                                 | MeSH descriptor: [Adenoma, Islet Cell] this term only                                                                                                                                                                                                                                                                                                    |  | 27                   |
| 18                                 | MeSH descriptor: [Insulinoma] this term only                                                                                                                                                                                                                                                                                                             |  | 11                   |
| 19                                 | MeSH descriptor: [Carcinoma, Islet Cell] this term only                                                                                                                                                                                                                                                                                                  |  | 7                    |
| 20                                 | MeSH descriptor: [Gastrinoma] this term only                                                                                                                                                                                                                                                                                                             |  | 6                    |
| 21                                 | MeSH descriptor: [Glucagonoma] this term only                                                                                                                                                                                                                                                                                                            |  | 2                    |
| 22                                 | 1 OR 2 OR 3 OR 4 OR 5 OR 6 OR 7 OR 8 OR 9 OR 10<br>OR 11 OR 12 OR 13 OR 14 OR 15 OR 16 OR 17 OR 18<br>OR 19 OR 20 OR 21                                                                                                                                                                                                                                  |  | 455                  |
| 23                                 | (neuroendocrine NEAR/4 (tumo?r* OR neoplas* OR cancer*<br>OR carcinom*OR malignanc*)):ti,ab,kw                                                                                                                                                                                                                                                           |  | 963                  |
| 24                                 | ((((carcinom* NEAR/2 medulla*) OR (cancer NEAR/2 medulla*)<br>OR (tumo?r* NEAR/2 medulla*))) :ti,ab,kw                                                                                                                                                                                                                                                   |  | 182                  |
| 25                                 | (pNET OR PanNEN OR PanNET OR 'Non functioning pancreatic endocrine tumo?r*' OR<br>'Non-functioning pancreatic endocrine tumo?r*' OR 'adenoma islet cell' OR insulinoma* OR<br>'carcinom* islet cell' OR gastrinoma* OR glucagonoma* OR 'Zollinger Ellison Syndrome' OR<br>'pancreas<br>islet cell tumo?r*' OR 'pancreas islet cell carcinom*') :ti,ab,kw |  | 710                  |

|               |    |                                                                                                                                                                                                                                                                                                                                                                                                                                                                                                                                        |         |
|---------------|----|----------------------------------------------------------------------------------------------------------------------------------------------------------------------------------------------------------------------------------------------------------------------------------------------------------------------------------------------------------------------------------------------------------------------------------------------------------------------------------------------------------------------------------------|---------|
|               | 26 | (lungcarcinoid* OR carcinoid* OR somatostatinoma* OR vipoma* OR apudoma* OR (adenoma* NEAR/2 chromophobe) OR (adenoma* NEAR/2 basophil*) OR (adenoma* NEAR/2 acidophil*) OR "Multiple Endocrine Neoplasia Type 1" OR "MEN 1" OR Neurilemmoma* OR Neurilemoma* OR Schwannoma* OR Neurinoma* OR Schwannomatosis OR Schwannomatoses OR Paraganglioma* OR Pheochromocytoma*):ti,ab,kw                                                                                                                                                      | 951     |
|               | 27 | ((merk* NEAR/4 (tumo?r* OR cancer OR carcinom*)):ti,ab,kw                                                                                                                                                                                                                                                                                                                                                                                                                                                                              | 77      |
|               | 28 | 23 OR 24 OR 25 OR 26 OR 27                                                                                                                                                                                                                                                                                                                                                                                                                                                                                                             | 2,440   |
|               | 29 | 22 OR 28                                                                                                                                                                                                                                                                                                                                                                                                                                                                                                                               | 2,464   |
| Therapeutics  |    |                                                                                                                                                                                                                                                                                                                                                                                                                                                                                                                                        |         |
|               | 30 | MeSH descriptor: [Therapeutics] explode all trees                                                                                                                                                                                                                                                                                                                                                                                                                                                                                      | 304,349 |
|               | 31 | MeSH descriptor: [Antineoplastic Agents] explode all trees                                                                                                                                                                                                                                                                                                                                                                                                                                                                             | 12,136  |
|               | 32 | MeSH descriptor: [Lutetium] this term only                                                                                                                                                                                                                                                                                                                                                                                                                                                                                             | 2       |
|               | 33 | 30 OR 31 OR 32                                                                                                                                                                                                                                                                                                                                                                                                                                                                                                                         | 307,790 |
|               | 34 | (therap* OR radiotherap* OR 'radiofrequency ablat*' OR 'radio-frequency ablat*' OR 'radio frequency ablat*' OR RFablat* OR thermoablat* OR 'local ablat*' OR 'transarterial emboli?ation' OR 'transarterial emboli?ation' OR 'transarterial chemoemboli?ation' OR 'transarterial chemoemboli?ation'<br>OR radioemboli?ation OR somatostatin OR telotristat OR interferon OR chemotherap* OR 'peptide recept OR radiotherap*' OR 'targeted molecular therap*' OR immunotherap* OR radiopeptide OR DOTATOC OR DOTATATE OR PRRT):ti,ab,kw | 785,854 |
|               | 35 | (lutetium OR edotreotide OR radiopeptide* OR "peptide recept OR radionuclear therapy" OR OCTREOTATE OR DOTAOR 177Lu OR Lu177 OR "Lu-177" OR "177-Lu" OR lutetium177):ti,ab,kw                                                                                                                                                                                                                                                                                                                                                          | 261     |
|               | 36 | 34 OR 35                                                                                                                                                                                                                                                                                                                                                                                                                                                                                                                               | 785,903 |
|               | 37 | 33 OR 36                                                                                                                                                                                                                                                                                                                                                                                                                                                                                                                               | 857,235 |
| Combined sets |    |                                                                                                                                                                                                                                                                                                                                                                                                                                                                                                                                        |         |
|               | 38 | 29 AND 37                                                                                                                                                                                                                                                                                                                                                                                                                                                                                                                              | 1,664   |
|               | 39 | 29 AND 37 in Trials                                                                                                                                                                                                                                                                                                                                                                                                                                                                                                                    | 1,643   |

| Search terms in Clinical trials.gov |                                                                                                                                                                          |  | Number of references |
|-------------------------------------|--------------------------------------------------------------------------------------------------------------------------------------------------------------------------|--|----------------------|
| Neuroendocrine tumors               |                                                                                                                                                                          |  |                      |
| 1                                   | Recruiting, Completed, Suspended, Terminated, Withdrawn, Unknown status Studies   Interventional Studies   Neuroendocrine Tumors   Antineoplastic Agents   Phase 3, 4 )  |  | 122                  |
| 2                                   | Recruiting, Completed, Suspended, Terminated, Withdrawn, Unknown status Studies   Interventional Studies   Neuroendocrine Tumors   Therapy   Phase 3, 4                  |  | 120                  |
| 3                                   | Radiotherapy   Recruiting, Completed, Suspended, Terminated, Withdrawn, Unknown status Studies   Interventional Studies   Neuroendocrine Tumors   Phase 3, 4             |  | 28                   |
| 4                                   | Recruiting, Completed, Suspended, Terminated, Withdrawn, Unknown status Studies   Interventional Studies   Neuroendocrine Tumors   Drug Therapy   Phase 3, 4             |  | 66                   |
| 5                                   | Recruiting, Completed, Suspended, Terminated, Withdrawn, Unknown status Studies   Interventional Studies   Neuroendocrine Tumors   Drug   Phase 3, 4                     |  | 167                  |
| Neuroendocrine carcinoma            |                                                                                                                                                                          |  |                      |
| 7                                   | Recruiting, Completed, Suspended, Terminated, Withdrawn, Neuroendocrine Carcinoma   Antineoplastic Agents   Phase Unknown status Studies   Interventional Studies   5, 4 |  | 2                    |
| 8                                   | Recruiting, Completed, Suspended, Terminated, Withdrawn, Unknown status Studies   Interventional Studies   Neuroendocrine Carcinoma   Therapy   Phase 3, 4               |  | 4                    |
| 9                                   | Recruiting, Completed, Suspended, Terminated, Withdrawn, Unknown status Studies   Interventional Studies   Neuroendocrine Carcinoma   Therapeutics   Phase 3, 4          |  | 3                    |
| 10                                  | Recruiting, Completed, Suspended, Terminated, Withdrawn, Unknown status Studies   Interventional Studies   Neuroendocrine Carcinoma   Radiotherapy   Phase 3, 4          |  | 0                    |
| 11                                  | Recruiting, Completed, Suspended, Terminated, Withdrawn, Unknown status Studies   Interventional Studies   Neuroendocrine Carcinoma   Drug Therapy   Phase 3, 4          |  | 1                    |
| 12                                  | Recruiting, Completed, Suspended, Terminated, Withdrawn, Unknown status Studies   Interventional Studies   Neuroendocrine Carcinoma   Drug   Phase 3, 4                  |  | 5                    |
|                                     | 1-12/OR                                                                                                                                                                  |  | 518                  |

**Supplementary Table 3:** A. List of serious and not-serious disorders B. Specific cardiac adverse effects and C. Specific vascular adverse effects including hypertension assessed in the present study in order to categorize toxicities into different safety profiles (all grade toxicities and grade 3 and 4 toxicities) according to the National Cancer Institute Common Terminology Criteria for Adverse Events v5.0 mainly from clinicaltrials.gov.

- A. Blood and lymphatic system disorders; Cardiac disorders; Ear and labyrinth disorders; Endocrine disorders; Gastrointestinal disorders; General disorders; Hepatobiliary disorders; Immune system disorders; Infections and infestations; Injury, poisoning and procedural complications; Metabolism and nutrition disorders; Musculoskeletal and connective tissue disorders; Neoplasms benign, malignant and unspecified; Nervous system disorders; Psychiatric disorders; Renal and urinary disorders; Reproductive system and breast disorders; Respiratory, thoracic and mediastinal disorders; Vascular disorders.
- B. Cardiac disorders: acute coronary syndrome, angina pectoris, coronary artery stenosis, aortic valve stenosis, pulmonary valve stenosis, cardiac failure, acute cardiac failure, congestive cardiac failure, cardiopulmonary failure, ventricular failure, tricuspid valve incompetence, mitral valve incompetence, left ventricular dysfunction, right ventricular dysfunction, atrioventricular block second degree, myocardial infarction, myocardial dysfunction, myocarditis, pericarditis, pericardial effusion, pericardial haemorrhage, palpitations, tachycardia paroxysmal, cardiac arrest, cardio-respiratory arrest, Acute myocardial infarction, arrhythmia, supraventricular tachycardia, ventricular arrhythmia, atrial fibrillation, atrial flutter, bradycardia.
- C. Vascular disorders: hypertension, hypotension, circulatory collapse, hypertensive crisis, deep vein thrombosis, vena cava thrombosis, arterial thrombosis, thromboembolic event, phlebitis, haemorrhage.

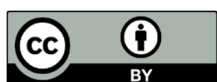

© 2021 by the authors. Licensee MDPI, Basel, Switzerland. This article is an open access article distributed under the terms and conditions of the Creative Commons Attribution (CC BY) license (<http://creativecommons.org/licenses/by/4.0/>).
